# Supplementary material for: Rational synthesis of CoFeP@nickel–manganese sulfide core–shell nanoarrays for hybrid supercapacitors
Source: Royal Society of Chemistry journal article supplement (doi:10.1039/d1dt03196a), 2021-01-01
Supplement: d1dt03196a1.pdf [file d1dt03196a1.pdf]

**Rational synthesis of CoFeP@nickel-manganese sulfide core-shell nanoarrays  
for hybrid supercapacitor**

Yameng Wang<sup>a,b</sup>, Yan Zhang<sup>b</sup>, Cheng Du<sup>b</sup>, Jian Chen<sup>b</sup>, Zhengfang Tian<sup>a,b</sup>, Mingjiang  
Xie<sup>a,b</sup>, Liu Wan<sup>\*a,b</sup>

<sup>a</sup>College of Materials and Chemical Engineering, China Three Gorges University,  
Yichang, 443002, China

<sup>b</sup>Hubei Key Lab for Processing and Application of Catalytic Materials, College of  
Chemical Engineering, Huanggang Normal University, Huanggang, 438000, China

\*Corresponding author.

E-mail: wanliuok2006@163.com

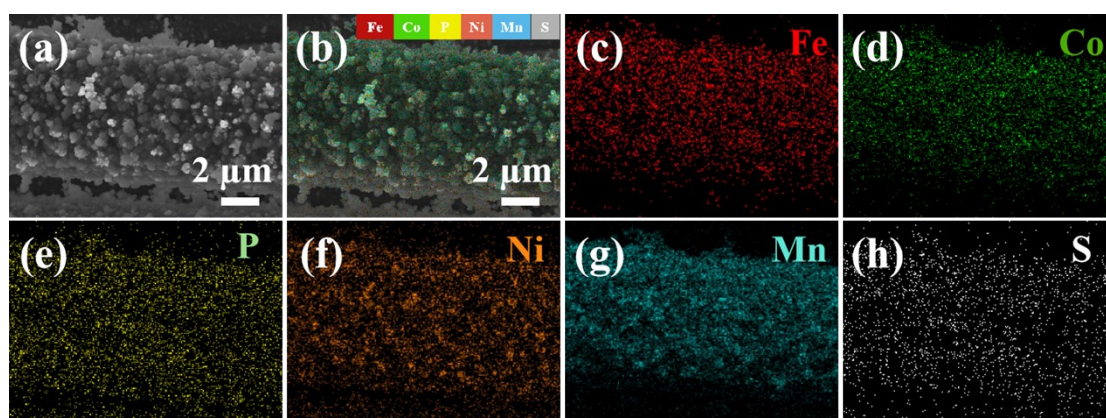

Fig. S1 (a,b) SEM images for the corresponding EDX mapping image of CoFeP@NiMnS/CC, (c) Fe elemental mapping, (d) Co elemental mapping, (e) P elemental mapping, (f) Ni elemental mapping, (g) Mn elemental mapping, and (h) S elemental mapping.

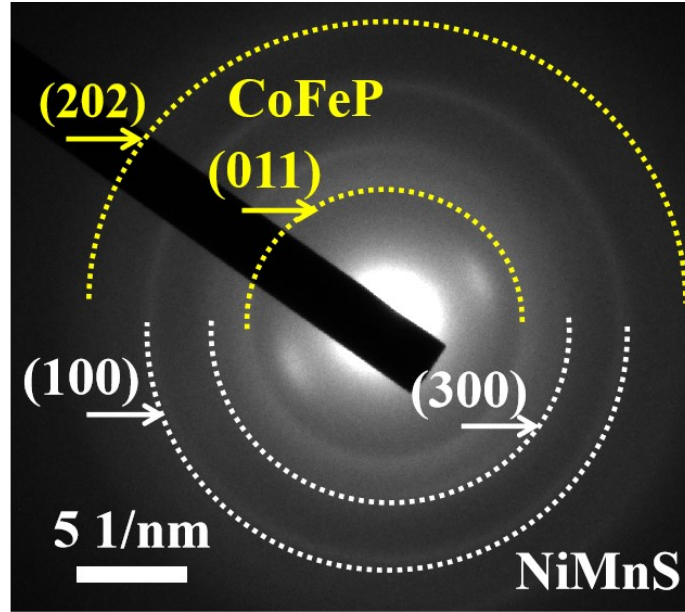

Fig. S2 The selected area electron diffraction (SEAD) pattern of CoFeP@NiMnS.

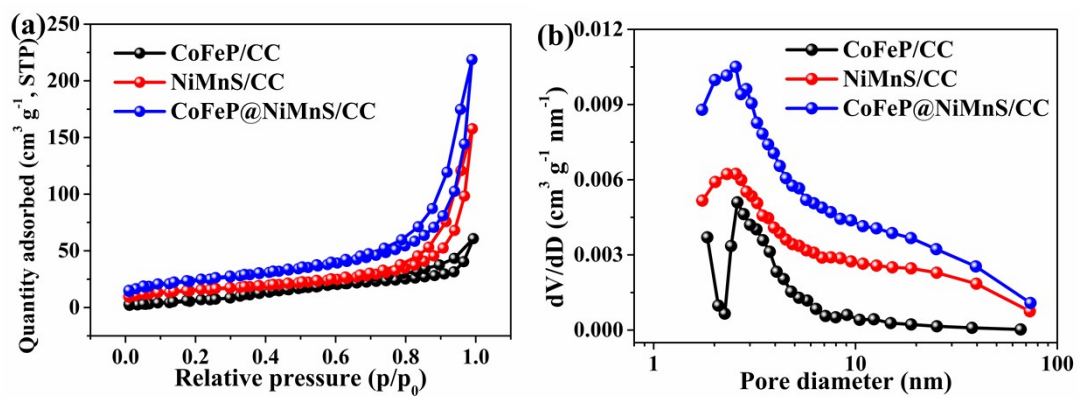

Fig. S3 (a) N<sub>2</sub> adsorption-desorption isotherms, and (b) pore size distributions of the CoFeP/CC, NiMnS/CC, and CoFeP@NiMnS/CC.

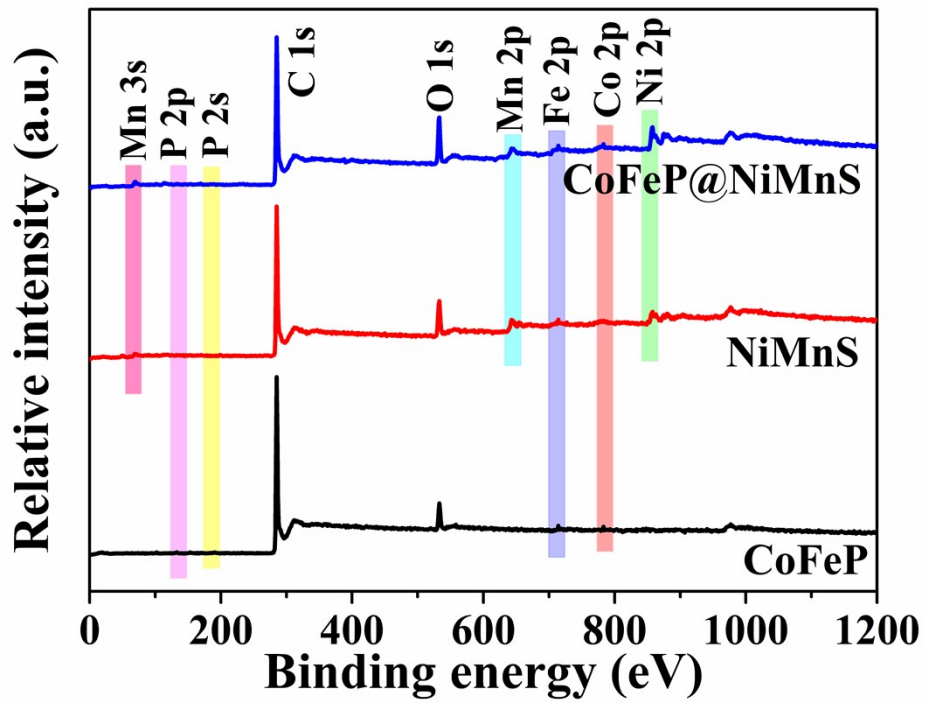

Fig. S4 XPS surveys of CoFeP/CC, NiMnS/CC, and CoFeP@NiMnS/CC.

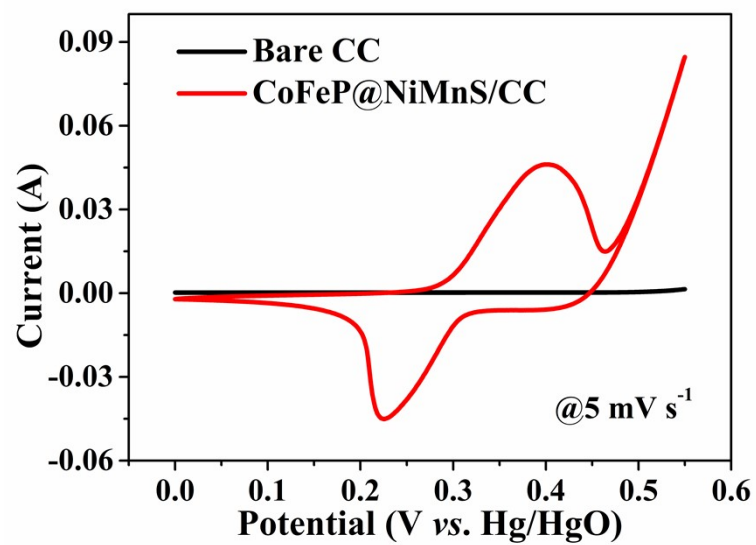

Fig. S5 Comparison of CV curves of bare carbon cloth and CoFeP@NiMnS/CC electrodes at a scan rate of 5 mV s<sup>-1</sup>.

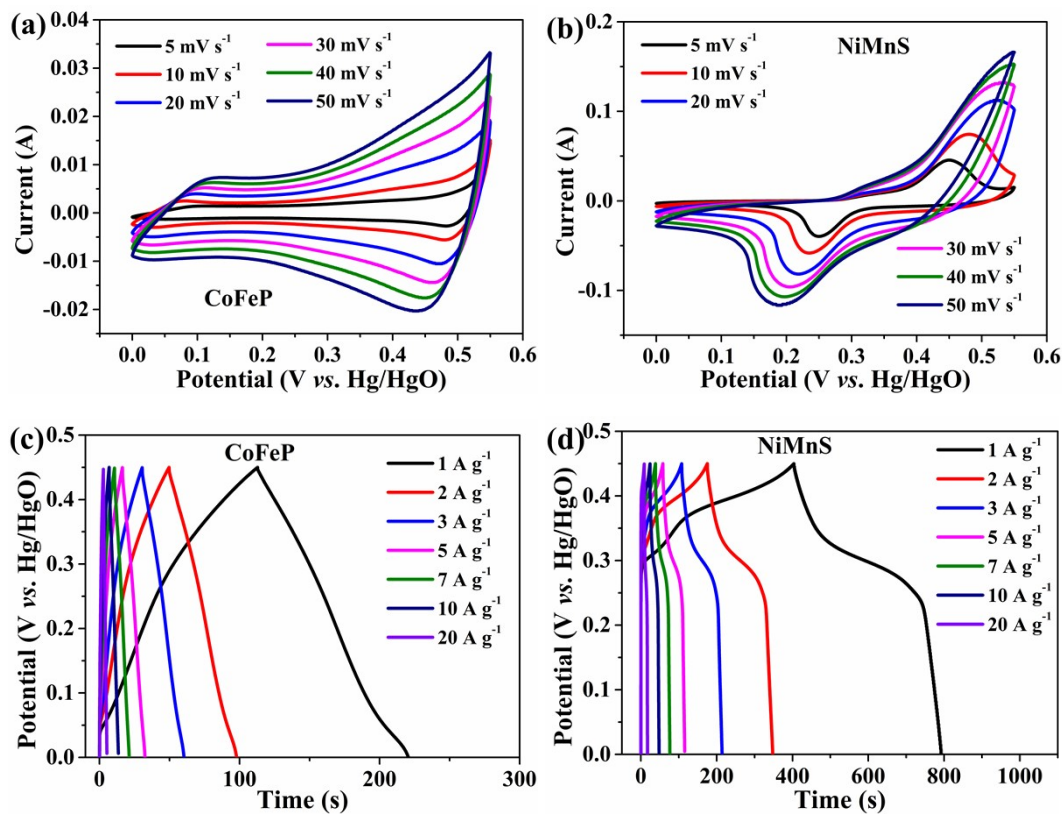

Fig. S6 Electrochemical performance tested in a three-electrode system in 2.0 M KOH electrolyte: CV curves of (a) CoFeP/CC electrode and (b) NiMnS/CC electrode, and GCD curves of (c) CoFeP/CC electrode and (d) NiMnS/CC electrode.

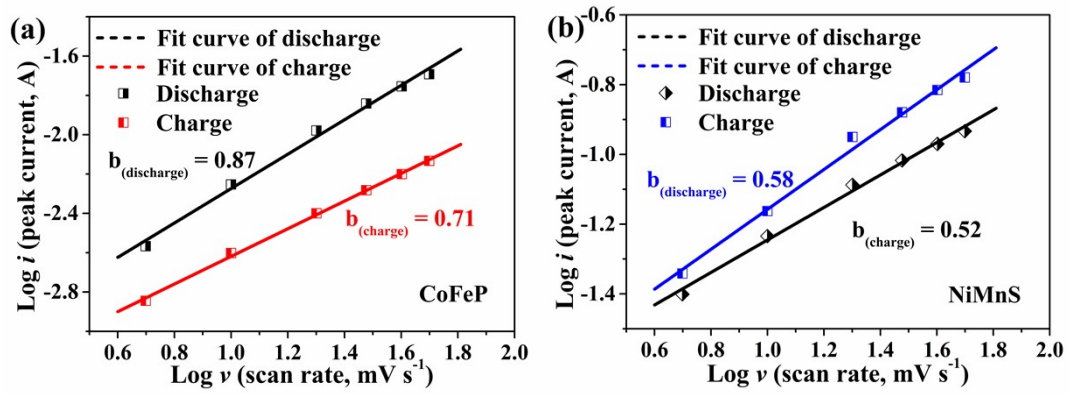

Fig. S7 The linear relationship between the peak current and the scan rate during charge and discharge for (a) the CoFeP/CC and (b) NiMnS/CC electrodes.



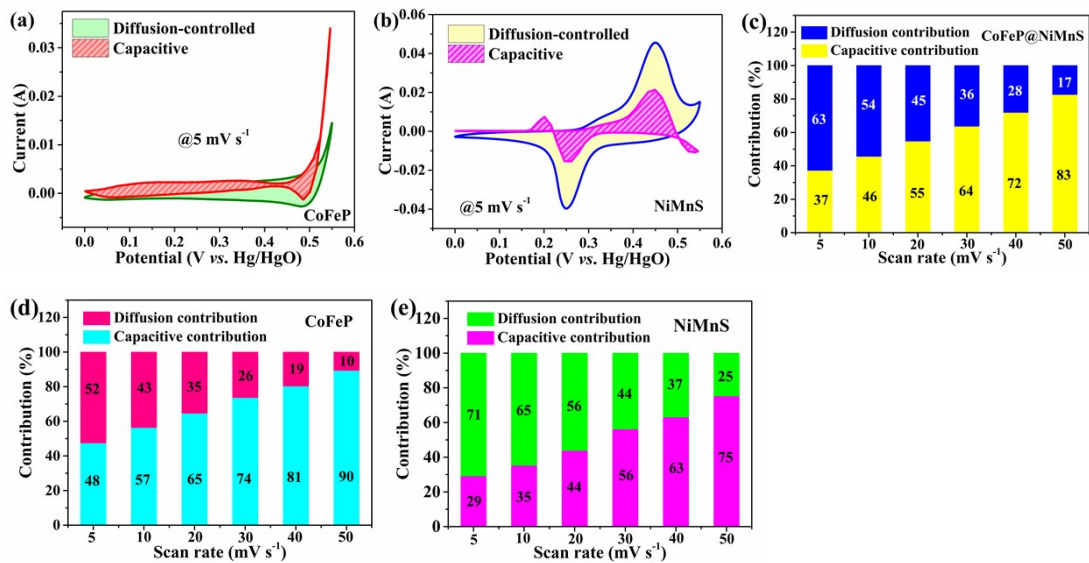

Fig. S8 The diffusion-controlled and capacitive-controlled CV response at 5 mV s<sup>-1</sup> of (a) the CoFeP/CC and (b) NiMnS/CC electrode, and the percentages of capacitive contribution at different scan rates of 5-50 mV s<sup>-1</sup> for (c) CoFeP@NiMnS/CC, (d) CoFeP/CC, and (e) NiMnS/CC electrodes.

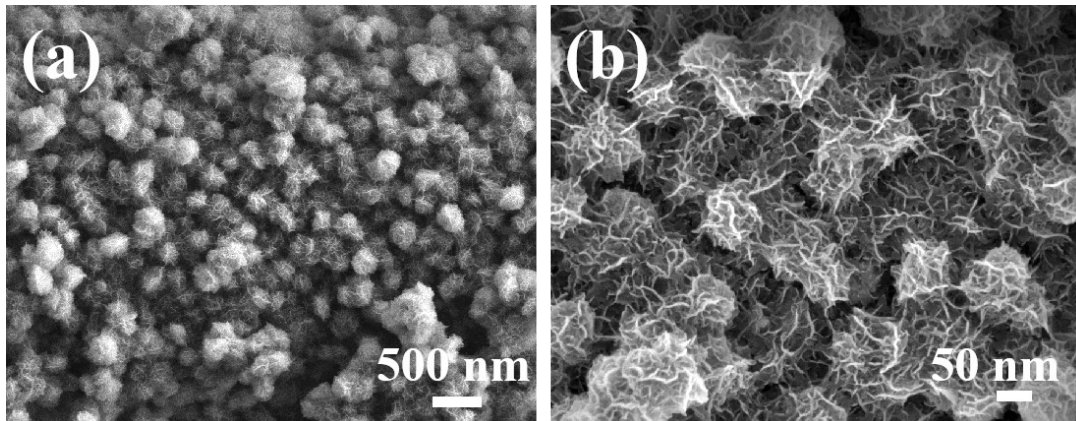

Fig. S9 SEM images of CoFeP@NiMnS/CC electrode after 5000 cycles at 5 A g<sup>-1</sup> at (a) low and (b) high magnifications.

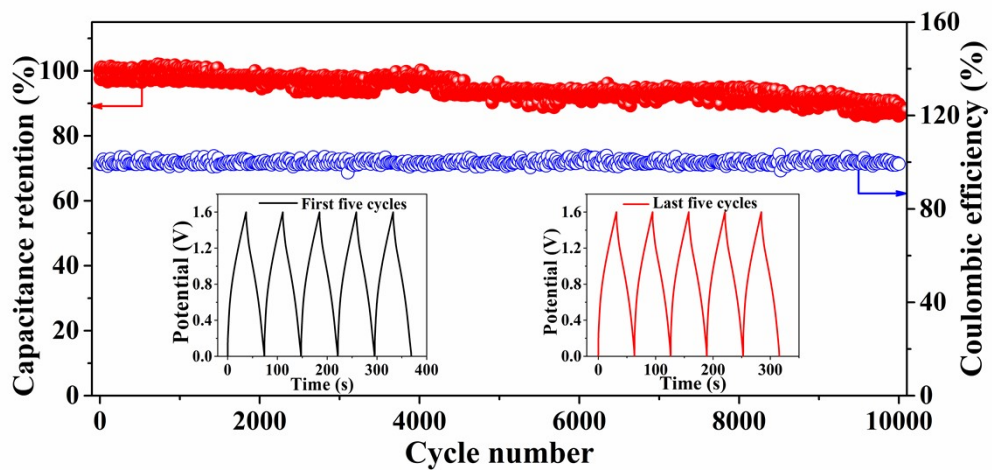

Fig. S10 The cyclic performance and coulombic efficiency of the assembled CoFeP@NiMnS/CC//LPC-Cu HSC device over 10000 cycles at  $5 \text{ A g}^{-1}$  (inset shows the first and last five GCD cycles).

**Table S1** Specific surface areas and pore parameters of CoFeP/CC, NiMnS/CC, and

CoFeP@NiMnS/CC.

| Samples        | $S_{\text{BET}}$<br>( $\text{m}^2 \text{g}^{-1}$ ) <sup>a</sup> | $S_{\text{micro}}$<br>( $\text{m}^2 \text{g}^{-1}$ ) <sup>b</sup> | $V_{\text{total}}$<br>( $\text{cm}^3 \text{g}^{-1}$ ) <sup>c</sup> | $V_{\text{micro}}$<br>( $\text{cm}^3 \text{g}^{-1}$ ) |
|----------------|-----------------------------------------------------------------|-------------------------------------------------------------------|--------------------------------------------------------------------|-------------------------------------------------------|
| CoFeP/CC       | 38.6                                                            | 1.02                                                              | 0.102                                                              | 0.008                                                 |
| NiMnS/CC       | 61.3                                                            | 4.73                                                              | 0.137                                                              | 0.031                                                 |
| CoFeP@NiMnS/CC | 89.7                                                            | 6.36                                                              | 0.169                                                              | 0.082                                                 |

<sup>a</sup> Specific surface area ( $S_{\text{BET}}$ ) was calculated via Brunauer-Emmett-Teller (BET) method.

<sup>b</sup> Micropore surface area ( $S_{\text{mic}}$ ) was calculated from t-plot method.

<sup>c</sup> Total pore volume ( $V_{\text{total}}$ ) was obtained from the adsorbed amount at a relative pressure of 0.99.

**Table S2** Comparison of the electrochemical performances of the as-fabricated CoFeP@NiMnS/CC electrode with previously reported core-shell electrode materials in literature.

| Electrode                                             | Synthesis method                                           | Specific capacity (mAh g <sup>-1</sup> )          | Rate performance                   | Maximum energy density (W kg <sup>-1</sup> )              | Cycling stability               | Ref.             |
|-------------------------------------------------------|------------------------------------------------------------|---------------------------------------------------|------------------------------------|-----------------------------------------------------------|---------------------------------|------------------|
| NiCoP@CoS                                             | Hydrothermal method and phosphorization                    | 1796 F g <sup>-1</sup> (2 A g <sup>-1</sup> )     | 68.3% (20 A g <sup>-1</sup> )      | 35.8 Wh kg <sup>-1</sup> at 748.9 W kg <sup>-1</sup>      | 86.1% after 10000 cycles        | 1                |
| NiCoP@MoSe <sub>2</sub>                               | Hydrothermal, phosphorization and CVD                      | 2245.4 F g <sup>-1</sup> (1 mA cm <sup>-2</sup> ) | 91.6% (10 A g <sup>-1</sup> )      | 55.1 Wh kg <sup>-1</sup> at 799.8 W kg <sup>-1</sup>      | 95.8% after 8000 cycles         | 2                |
| CoP@NiCoP                                             | Hydrothermal method and phosphorization                    | 265.5 (2 A g <sup>-1</sup> )                      | 61.68% (25 A g <sup>-1</sup> )     | 37.16 Wh kg <sup>-1</sup> at 875 W kg <sup>-1</sup>       | 50% after 1000 cycles           | 3                |
| NiCoP/NiCo-OH                                         | Hydrothermal method and phosphorization                    | 1100 (1 A g <sup>-1</sup> )                       | 60% (10 A g <sup>-1</sup> )        | 34 Wh kg <sup>-1</sup> at 775 W kg <sup>-1</sup>          | 92% after 1000 cycles           | 4                |
| CuCo-P@Ni(OH) <sub>2</sub>                            | Solvothermal, phosphorization and electrodeposition        | 230.6 (2 mA cm <sup>-2</sup> )                    | 86.3% (20 mA cm <sup>-2</sup> )    | 40 Wh kg <sup>-1</sup> at 319.6 W kg <sup>-1</sup>        | 73% after 6000 cycles           | 5                |
| ZnCo <sub>2</sub> O <sub>4</sub> @Ni-Co-S             | Hydrothermal method and electrodeposition                  | 1396.9 C g <sup>-1</sup> (1 A g <sup>-1</sup> )   | 52.8% (10 A g <sup>-1</sup> )      | 53.1 Wh kg <sup>-1</sup> at 3375 W kg <sup>-1</sup>       | 85.5% after 10000 cycles        | 6                |
| Co-CH@NiCoMn-CH                                       | Solvothermal method                                        | 3224 F g <sup>-1</sup> (1 A g <sup>-1</sup> )     | 83.97% (5 A g <sup>-1</sup> )      | 20.31 Wh kg <sup>-1</sup> at 748.46 W kg <sup>-1</sup>    | 90.4% after 6000 cycles         | 7                |
| Co-MoS <sub>2</sub> @Cu <sub>2</sub> MoS <sub>4</sub> | Hydrothermal method                                        | 220 (1 A g <sup>-1</sup> )                        | 64% (10 A g <sup>-1</sup> )        | 41.6 Wh kg <sup>-1</sup> at 6240 W kg <sup>-1</sup>       | 92.8% after 5000 cycles         | 8                |
| <b>CoFeP@NiMnS/CC</b>                                 | <b>Hydrothermal, phosphorization and electrodeposition</b> | <b>260.7 (1 A g<sup>-1</sup>)</b>                 | <b>65.9% (20 A g<sup>-1</sup>)</b> | <b>60.1 Wh kg<sup>-1</sup> at 371.8 W kg<sup>-1</sup></b> | <b>85.7% after 10000 cycles</b> | <b>This work</b> |

## References

- [1] Z. Xu, C. Du, H. Yang, J. Huang, X. Zhang, J. Chen, NiCoP@CoS tree-like core-shell nanoarrays on nickel foam as battery-type electrodes for supercapacitors, Chem.

Eng. J. (2021) 127871.

[2] X. Gao, L. Yin, L. Zhang, Y. Zhao, B. Zhang, Decoration of NiCoP nanowires with interlayer-expanded few-layer MoSe<sub>2</sub> nanosheets: A novel electrode material for asymmetric supercapacitors, Chem. Eng. J. 395 (2020) 125058.

[3] X. Wang, C. Jing, W. Zhang, X. Wang, X. Liu, B. Dong, Y. Zhang, One-step phosphorization synthesis of CoP@NiCoP nanowire/nanosheet composites hybrid arrays on Ni foam for high performance supercapacitors, Appl. Surf. Sci. 532 (2020) 147437.

[4] X. Li, H. Wu, A.M. Elshahawy, L. Wang, S.J. Pennycook, C. Guan, J. Wang, Cactus-like NiCoP/NiCo-OH 3D architecture with tunable composition for high-performance electrochemical capacitors, Adv. Funct. Mater. 28 (2018) 1800036.

[5] X. Li, J. Huang, L. Wang, J. Zhang, S. Song, G. Li, P. Wang, P. Sun, Y. Yang, Hierarchical honeycomb-like networks of CuCo-P@Ni(OH)<sub>2</sub> nanosheet arrays enabling high-performance hybrid supercapacitors, J. Alloys Compd. 838 (2020) 155626.

[6] M. Dai, D. Zhao, H. Liu, X. Zhu, X. Wu, B. Wang, Nanohybridization of Ni-Co-S nanosheets with ZnCo<sub>2</sub>O<sub>4</sub> nanowires as supercapacitor electrodes with long cycling stabilities, ACS Appl. Energy Mater. 4 (2021) 2637–2643.

[7] Y. Zhong, X. Cao, Y. Liu, L. Cui, J. Liu, Nickel cobalt manganese ternary carbonate hydroxide nanoflakes branched on cobalt carbonate hydroxide nanowire arrays as novel electrode material for supercapacitors with outstanding performance, J. Colloid Interf. Sci. 581 (2021) 11–20.

[8] S.K. Hussain, B.N.V. Krishna, G. Nagaraju, S.C. Sekhar, D. Narsimulu, J.S. Yu, Porous Co-MoS<sub>2</sub>@Cu<sub>2</sub>MoS<sub>4</sub> three-dimensional nanoflowers via in situ sulfurization of Cu<sub>2</sub>O nanospheres for electrochemical hybrid capacitors, Chem. Eng. J. 403 (2021) 126319.
